# Supplementary material for: Impact of Individual Headache Types on the Work and Work Efficiency of Headache Sufferers
Source: MDPI journal article supplement (doi:10.3390/ijerph17186918), 2020-09-22
Supplement: s1 [file s1]

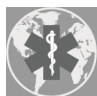

### Questionnaire about the Characteristics of Headaches

1. How old were you when the headache occurred for the first time? \_\_\_\_\_
2. How often do you have headache attacks?
  - a) < once a month
  - b) 1 to 14 days per month
  - c) > 14 days per month
  - d) \_\_\_\_\_
3. My headaches last:
  - a) Less than half an hour
  - b) 4 hours to 3 days
  - c) From half an hour to several days, 7 days the longest
  - d) More than 7 days
4. My headaches are located:
  - a) On one side of the head – with occasional change of side
  - b) Always on one side
  - c) On both sides
  - d) All around the head
  - e) \_\_\_\_\_
5. The intensity of the pain is: (from 1 to 10)
  - a) Mild (1-3)
  - b) Moderate (4-6)
  - c) Severe (7-10)
  - d) Insufferable
6. The quality of the pain you experience is:
  - a) Pulsating
  - b) Pressing or tightening
  - c) \_\_\_\_\_
7. Do your headaches worsen after physical activities such as walking or staircase climbing?
  - a) Yes
  - b) No
8. Do you avoid routine physical activities because you are afraid they might trigger your headache?
  - a) Yes
  - b) No
9. Are the headaches accompanied by?
  - a) Nausea
    - 1) Yes
    - 2) No
  - b) Vomiting
    - 1) Yes
    - 2) No
  - c) Photophobia (light sensitivity)
    - 1) Yes
    - 2) No
  - d) Phonophobia (noise sensitivity)

10. Do you have temporary visual, sensory or speech disturbance?

- a) Yes    b) No

11. Do you, during a headache attack, have tension and/or heightened tenderness of head or neck muscles?

- a) Yes    b) No

12. Do you have any body numbness or weakness?

- a) Yes    b) No

13. Do you have any indications of oncoming headache?

- a) Yes, \_\_\_\_\_  
b) No, none

14. Headache is usually triggered by:

- a) Certain foods, most commonly \_\_\_\_\_  
b) Certain drinks, most commonly \_\_\_\_\_  
c) Stress  
d) Fatigue  
e) Strong odors  
f) Changes in atmospheric pressure  
g) Menstrual periods  
h) \_\_\_\_\_

15. In the half or my visual field, lasting 5 minutes to an hour, along with the headache attack or an hour before one, there are following symptoms:

- a) Blinking lights, spots or lines  
b) Loss of sight  
c) No symptoms

16. Along with the headache attack or an hour before one I have following sensory symptoms, lasting 5 minutes up to an hour:

- a) A prickling sensation  
b) Numbness  
c) No symptoms

17. Headache usually occurs (only for female respondents):

- a) 3 to 7 days before menstrual period  
b) 2 days before and 3 days during the menstrual period  
c) Unrelated to menstrual period  
d) \_\_\_\_\_

18. Headache usually occurs (only for female respondents):

- a) Only during menstrual period  
b) During menstrual period but at other times as well  
c) Unrelated to menstrual period
